# Supplementary material
Source: MDPI journal article supplement (https://www.mdpi.com/2075-163X/10/2/88)
Supplement: s1 [file s1]

## Supplementary Materials

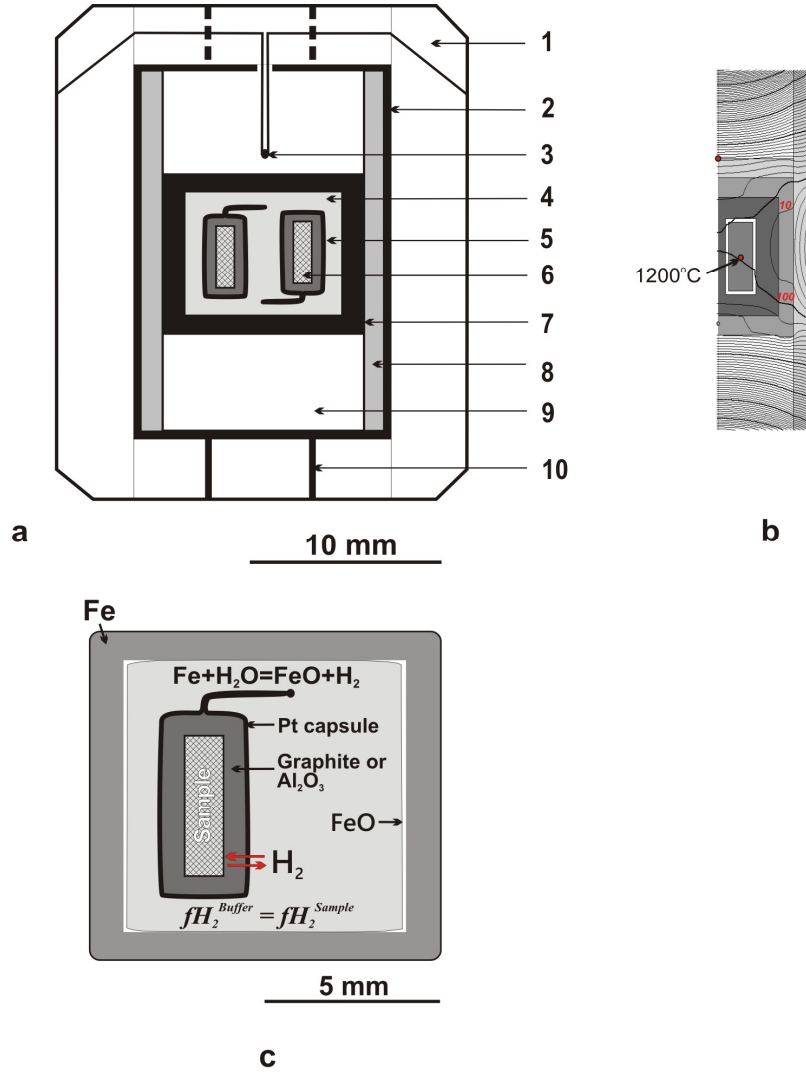

**Figure S1.** (a) The high-pressure cell; (b) temperature patterns in furnace assembly predicted using the software of Hernlund et al. [74] (simulations made for Pt capsule with graphite sample at 1200 °C, CsCl replaced by NaCl); (c) the double-capsule technique used to constrain the  $fH_2$  conditions by the assemblage Fe + FeO + H<sub>2</sub>O buffer (water in the outer capsule was released by talc decomposition into coesite, orthopyroxene under the applied P–T conditions; the main volume between outer and inner capsules was filled by high-melting CsCl). 1—ZrO<sub>2</sub> container; 2—cylindrical graphite heater; 3—PtRh<sub>6</sub>/PtRh<sub>30</sub> thermocouple; 4—talc and CsCl; 5—Pt capsule; 6—sample; 7—Mo or Fe capsule; 8—MgO; 9—ZrO<sub>2</sub>; 10—Mo leads.

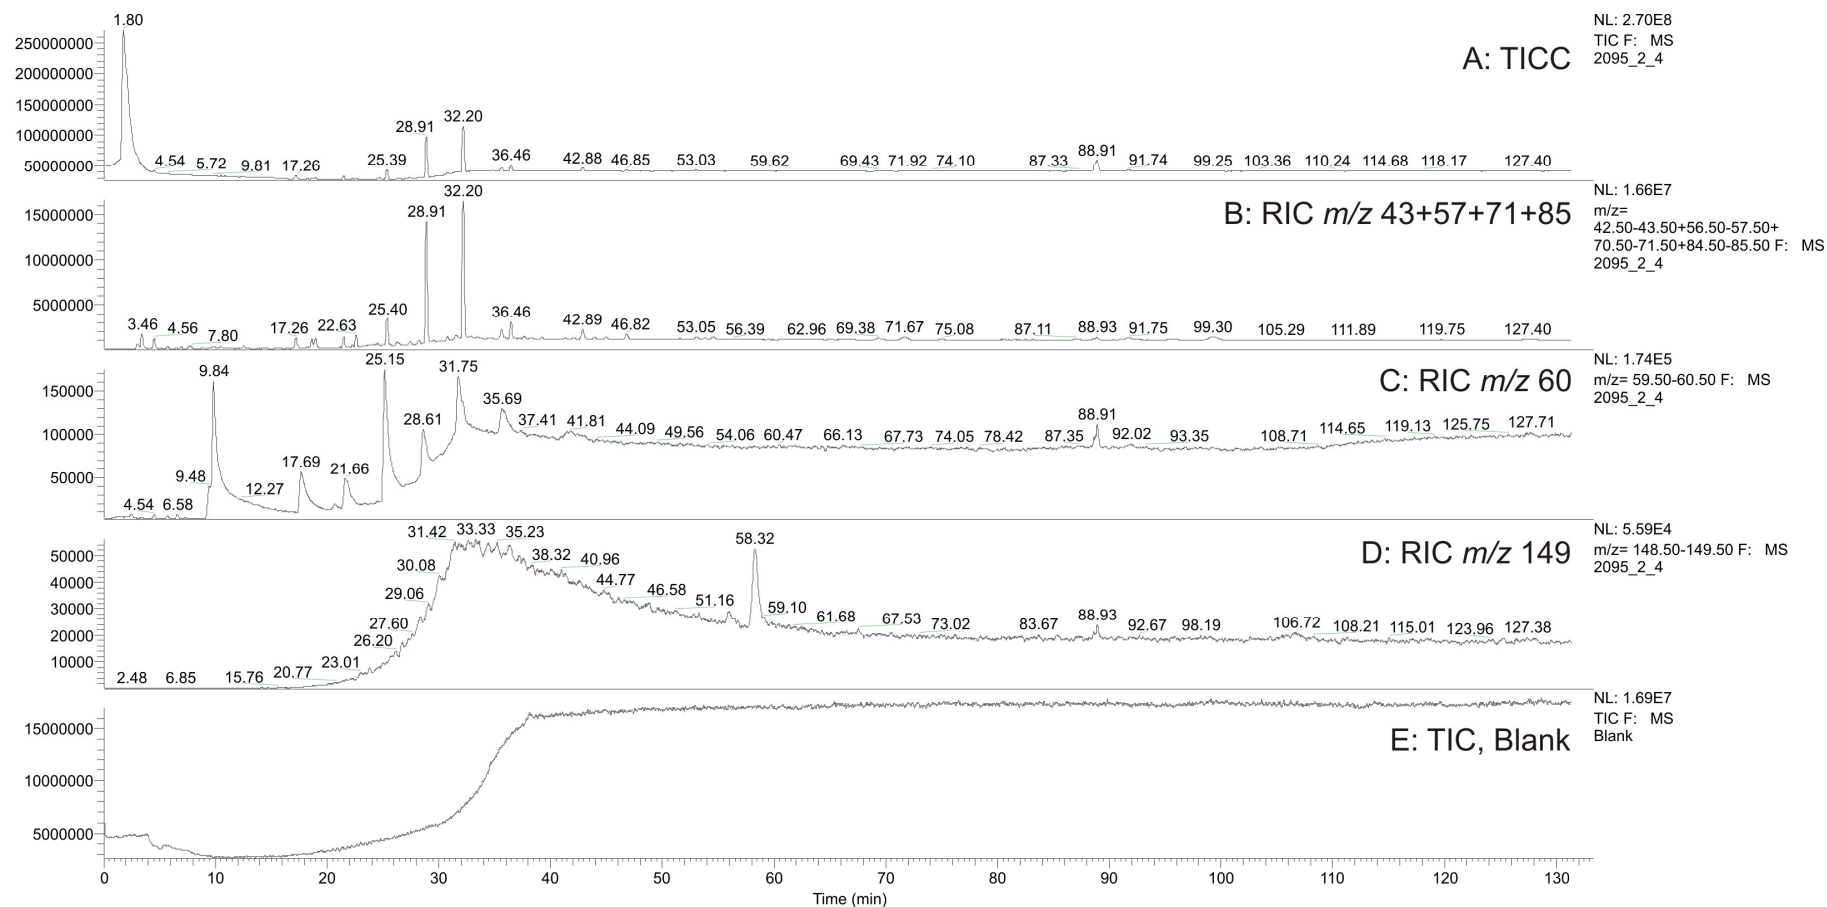

**Figure S2.** Results of GC-MS analysis of quenched fluid extracted by mechanical shock destruction from run 2095\_2\_4. (a) Total ion current chromatogram (TICC) and reconstructed ion chromatograms (RIC) for  $m/z$  43+57+71+85 (b),  $m/z$  60 (c),  $m/z$  149 (d), and TIC of a pre-run system blank (e).

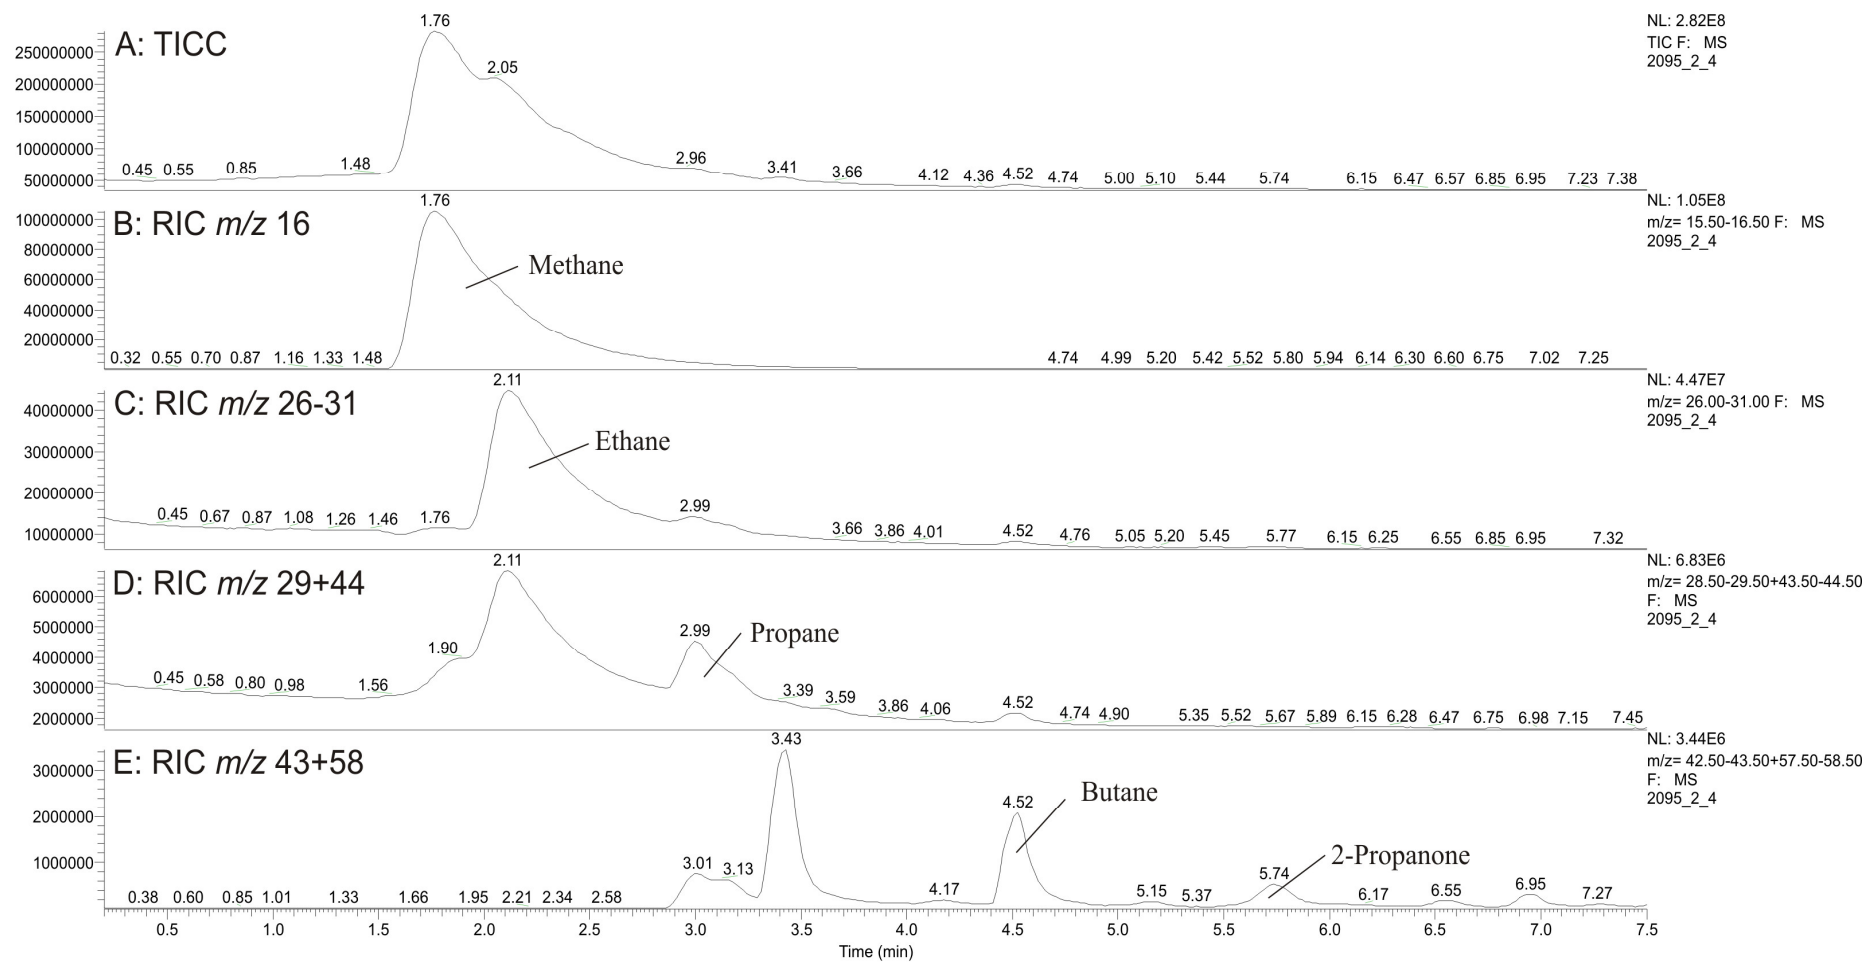

**Figure S3.** Results of GC-MS analysis of quenched fluid extracted by mechanical shock destruction from run 2095\_2\_4. (a) Fragments of a total ion current chromatogram (TICC) and reconstructed ion chromatograms (RIC) for  $m/z$  16 (b),  $m/z$  26-31 (c),  $m/z$  29+44 (d), and  $m/z$  43+58 (e).

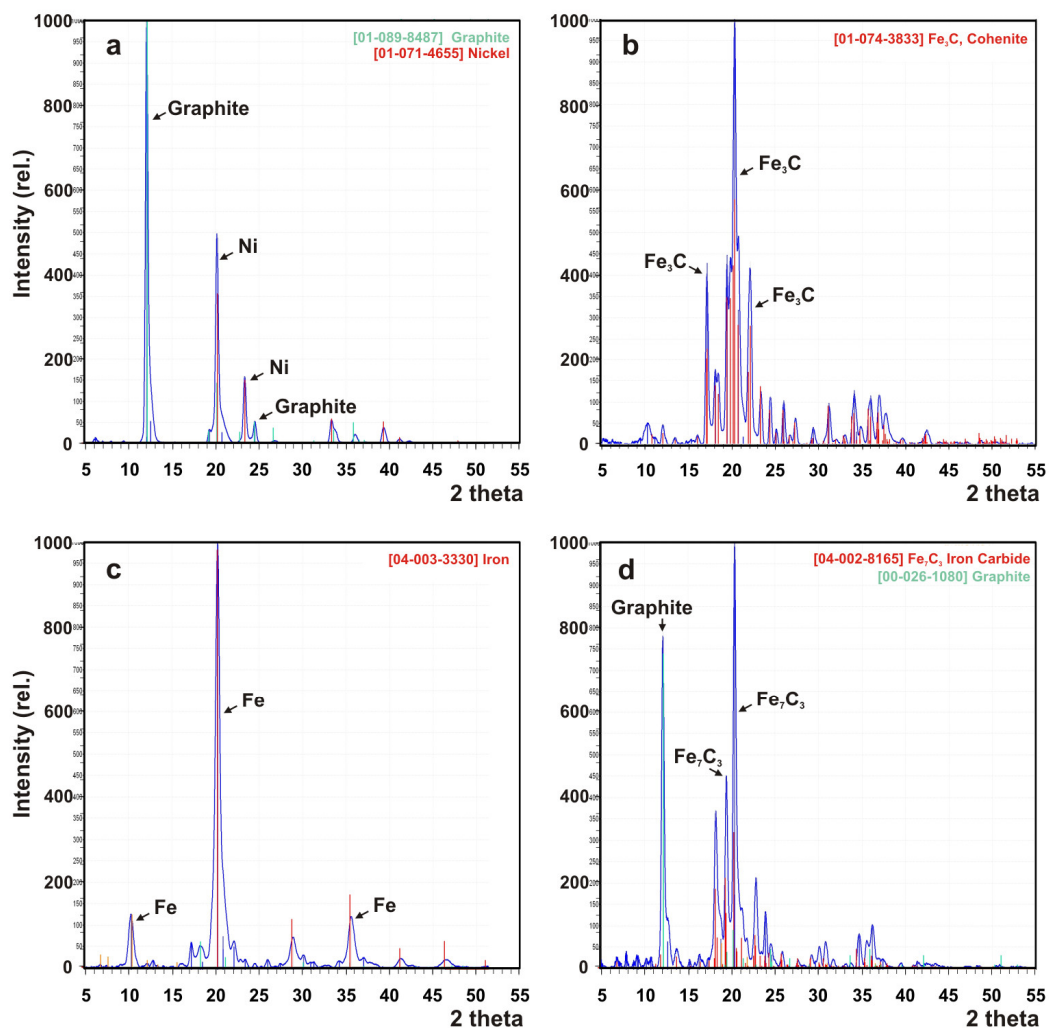

**Figure S4.** Phases identified by X-ray powder diffraction in the Gandolfi mode. The database of PDF-4 Minerals (The Powder Diffraction File PDF-4 +, 2006) was used for phase analysis. a: graphite and nickel, run 1001\_4\_3; b: iron carbide (Fe<sub>3</sub>C), run 1001\_4\_4; c: iron, run 2095\_2\_2; d: iron carbide (Fe<sub>7</sub>C<sub>3</sub>) and carbon, run 2100\_2\_4.
